# Supplementary material for: Covichem: A biochemical severity risk score of COVID-19 upon hospital admission
Source: PubMed Central journal article supplement (PMC8101934; doi:10.1371/journal.pone.0250956), 2021-05-06
Supplement: pone.0250956.s006.pdf [file pone.0250956.s006.pdf]

| Variable                             | Training set<br>(n=163) |                   | Test set<br>(n=40)   |                   | External Validation set<br>(n=100) |                  |
|--------------------------------------|-------------------------|-------------------|----------------------|-------------------|------------------------------------|------------------|
|                                      | Non-severe<br>(n=86)    | Severe<br>(n=77)  | Non-severe<br>(n=20) | Severe<br>(n=20)  | Non-severe<br>(n=55)               | Severe<br>(n=45) |
| <b>Age (years)</b>                   | 59.5 (48, 71)           | 66 (57, 76)       | 56 (49, 85.3)        | 72 (62, 77)       | 58 (44,73)                         | 57 (53, 64)      |
| <b>Male sex, n (%)</b>               | 51 (59%)                | 28 (36%)          | 9 (45%)              | 8 (40%)           | 25 (45%)                           | 34 (75%)         |
| <b>Diabetes, n (%)</b>               | 13 (15%)                | 17 (22%)          | 3 (15%)              | 6 (30%)           | NA                                 | NA               |
| <b>Dyslipidemia, n (%)</b>           | 17 (20%)                | 17 (22%)          | 5 (25%)              | 6 (30%)           | NA                                 | NA               |
| <b>Hypertension, n (%)</b>           | 25 (29%)                | 38 (49%)          | 7 (35%)              | 11(55%)           | NA                                 | NA               |
| <b>Smoking, n (%)</b>                | 15 (17%)                | 21 (27%)          | 2 (10%)              | 1 (5%)            | NA                                 | NA               |
| <b>Obesity, n (%)</b>                | 11 (13%)                | 26 (34%)          | 2 (10%)              | 8 (40%)           | 5 (9%)                             | 12 (27%)         |
| <b>BMI (kg/m<sup>2</sup>)</b>        | 25.6 (24.3, 27.1)       | 27.3 (25.6, 31.7) | 26.2 (25.5, 26.6)    | 28.1 (25.6, 33.3) | NA                                 | NA               |
| <b>Cardiovascular disease, n (%)</b> | 17 (20%)                | 36 (46%)          | 6 (30%)              | 7 (35%)           | 5 (9%)                             | 26 (58%)         |
| <b>Cancer, n (%)</b>                 | 14 (16%)                | 16 (20%)          | 4 (20%)              | 1 (5%)            | NA                                 | NA               |
| <b>Infectious disease, n (%)</b>     | 2 (2%)                  | 2 (2.5%)          | 4 (20%)              | 0                 | NA                                 | NA               |
| <b>Inflammatory disease, n (%)</b>   | 11 (13%)                | 9 (12%)           | 2 (10%)              | 1 (5%)            | NA                                 | NA               |
| <b>Liver disease, n (%)</b>          | 2 (2%)                  | 1 (1%)            | 1 (5%)               | 2 (10%)           | NA                                 | NA               |
| <b>Renal disease, n (%)</b>          | 2 (2%)                  | 6 (8%)            | 2 (10%)              | 0                 | NA                                 | NA               |
| <b>Respiratory disease, n (%)</b>    | 20 (23%)                | 18 (23%)          | 4 (20%)              | 2 (10%)           | NA                                 | NA               |
| <b>ORF1 (Ct value)</b>               | 28.8 (23.5, 31.1)       | 29 (24.2, 31.1)   | 27.6 (23.7, 30.3)    | 28.2 (26, 29.5)   | NA                                 | NA               |
| <b>E-gene (Ct value)</b>             | 29.7 (24.2, 34)         | 29.9 (25.2, 32.6) | 28.4 (24, 32.1)      | 29.3 (26.7, 30.2) | NA                                 | NA               |
| <b>Natremia, mmol/L</b>              | 139 (136, 140)          | 137 (135,139)     | 138 (137, 139)       | 136(133, 138)     | 138 (137,140)                      | 138 (135,142)    |
| <b>Kaliemia, mmol/L</b>              | 3.92 (3.67, 4.10)       | 3.91 (3.63, 4.22) | 3.88 (3.74, 3.99)    | 3.99 (3.51, 4.15) | NA                                 | NA               |
| <b>Total proteins, g/L</b>           | 73 (68, 76)             | 71 (66, 75)       | 75 (71, 79)          | 71 (67, 75)       | NA                                 | NA               |
| <b>Albumin, g/L</b>                  | 31.9 (27.8, 36.3)       | 24.3 (20, 28.3)   | 33.2 (30.5, 35.7)    | 23.7 (20.5, 25.8) | 32 (30, 35)                        | 25 (22, 29)      |
| <b>CRP, mg/L</b>                     | 56.9 (10.9, 129)        | 135 (68, 192)     | 60 (20, 84)          | 110 (69, 233)     | NA                                 | NA               |

|                        |                   |                     |                   |                    |                   |                      |
|------------------------|-------------------|---------------------|-------------------|--------------------|-------------------|----------------------|
| <b>ALP, U/L</b>        | 67 (59, 84)       | 68 (59, 89)         | 65 (54, 70)       | 79 (63, 106)       | NA                | NA                   |
| <b>AST, U/L</b>        | 37 (30, 46)       | 50 (35, 68)         | 37 (27, 46)       | 49 (41, 70)        | NA                | NA                   |
| <b>ALT, U/L</b>        | 26 (18, 42)       | 33 (24, 48)         | 27 (19, 43)       | 37 (27, 46)        | NA                | NA                   |
| <b>Ferritin, ng/mL</b> | 437<br>(195, 818) | 1056<br>(601, 2119) | 352<br>(248, 646) | 920<br>(387, 1266) | 558<br>(205, 865) | 1785<br>(1108, 3280) |
| <b>LDH, U/L</b>        | 295 (237, 367)    | 400 (340, 483)      | 272 (243, 303)    | 433 (365, 492)     | 322 (246, 431)    | 478 (418, 595)       |
| <b>CK, U/L</b>         | 75 (37, 161)      | 140 (62, 270)       | 111 (68, 179)     | 213 (98, 798)      | 75 (32, 105)      | 250 (133, 466)       |
